# Supplementary material for: Coagulation and Anticoagulation in Fontan Patients
Source: Elsevier journal article supplement (doi:10.1016/j.cjca.2022.01.028), 2022-02-03
Supplement: mmc1 [file mmc1.pdf]

## SUPPLEMENTARY MATERIAL

### Supplemental Table S1. Overview of comparative studies on thromboprophylaxis in Fontan reported in this review

| Author, year              | Study type    | Era       | Cohort size, Fontan-type | Age     | FU time | Antithrombotics (n) | TE, n (%)    | MB, n (%) | Efficacy (TE) | Safety (MB)  |             |
|---------------------------|---------------|-----------|--------------------------|---------|---------|---------------------|--------------|-----------|---------------|--------------|-------------|
| <i>Alsaied</i><br>2015    | Meta-analysis | 1973-2009 | 1200                     | 3.4-8.5 | 7.1     | None (199)          | 37 (18.6)    | -         | ASA vs VKA    | N/A          |             |
|                           |               |           | APC, LT, ECC             |         |         | ASA (465)           | 40 (8.6)     | -         | OR 0.9 (NS)   |              |             |
|                           |               |           |                          |         |         | VKA (536)           | 48 (9.0)     | 2 (0.4)   |               |              |             |
| <i>Monagle</i><br>2011    | RCT           | 1998-2003 | 111                      | 4.8     | 2.0     | ASA (57)            | 12 (21.1)    | 0         | VKA vs ASA    | NS           |             |
|                           |               |           | LT, ECC                  |         |         | VKA (54)            | 13 (24.1)    | 1 (1.9)   | HR 1.4 (NS)   |              |             |
| <i>Pessotti</i><br>2014   | RCT           | 2008-2011 | 30                       | 5.3     | 2.0     | ASA (15)            | 7 (46.7)     | 0         | NS            | N/A          |             |
|                           |               |           | ECC                      |         |         | VKA (15)            | 3 (20)       | 0         |               |              |             |
| <i>McCrinkle</i><br>2021  | RCT           | 2013-2019 | 112                      | 4.1     | 1.0     | ASA (34)            | 3 (8.8)      | 0         | NS            | NS           |             |
|                           |               |           |                          |         |         |                     | Rivarox (66) | 1 (1.5)   | 1 (1.5)       |              |             |
| <i>Al-Jazairi</i><br>2019 | Observational | 1985-2010 | 431                      | 2.4     | 13.6    | None (29)           | -            | -         | NS            | NS           |             |
|                           |               |           | APC, LT, ECC             |         |         | ASA (36)            | 0.6%/yr      | 0.3%/yr   |               |              |             |
|                           |               |           |                          |         |         | VKA (366)           | 0.8%/yr      | 0.4%/yr   |               |              |             |
| <i>Small</i><br>2018      | Observational | 2004-2017 | 26                       | 25.9    | 2.8     | ASA (13)            | 6 (46.1)     | 1 (7.7)   | NS            | NS           |             |
|                           |               |           | APC                      |         |         | VKA (13)            | 1 (7.7)      | 3 (23.1)  |               |              |             |
| <i>Iyengar</i><br>2016    | Observational | 1997-2010 | 475                      | 4.8     | 7.0     | None (17)           | 0            | -         | VKA vs ASA    | N/A          |             |
|                           |               |           | ECC                      |         |         | ASA (157)           | 6 (3.8)      | -         | HR 1.3 (NS)   |              |             |
|                           |               |           |                          |         |         | VKA (301)           | 12 (4)       | 11 (3.7)  |               |              |             |
| <i>Kawamatsu</i><br>2021  | Observational | N/A       | 102                      | 27      | 7.9     | None (5)            | 2 (40)       | 0         | NOAC vs VKA:  | NOAC vs VKA: |             |
|                           |               |           |                          |         |         |                     | NOAC (36)    | 0         | 1 (2.8)       | P = 0.025    | HR 0.3 (NS) |
|                           |               |           |                          |         |         |                     | VKA (41)     | 5 (12.2)  | 6 (14.6)      |              |             |
|                           |               |           |                          |         |         |                     | ASA (43)     | 3 (7)     | 3 (7)         |              |             |
|                           |               |           |                          |         |         |                     | Combi (14)   | 0         | 8 (57.1)      |              |             |
| <i>Ankola</i><br>2021     | Observational | 2006-2016 | 192                      | 3.3     | 30 days | None (14)           | 11 (78.6)    | -         | VKA vs ASA:   | N/A          |             |
|                           |               |           |                          |         |         |                     | ASA (103)    | 5 (4.9)   | -             | OR 1.1 (NS)  |             |
|                           |               |           |                          |         |         |                     | VKA (52)     | 2 (3.8)   | -             |              |             |
|                           |               |           |                          |         |         |                     | Heparin (20) | 1 (5)     | -             |              |             |

TE = thromboembolic event; MB = major bleeding; VKA = vitamin K antagonist; ASA = acetylsalicylic acid; ATP = antiplatelets; NS = not statistically significant; N/A = not available
